# Supplementary material
Source: HighWire-hosted journal article supplement (https://bibliotheek.ehb.be/content/55/4/240)
Supplement: inline-supplementary-material-1 [file inline-supplementary-material-1.pdf]

Supplemental Table 1.

| CEM no. and gender | methylation in blood                 | clinical features                                              | transmission of CEM or segregation                                                | tumour diagnoses in the family                                                        |
|--------------------|--------------------------------------|----------------------------------------------------------------|-----------------------------------------------------------------------------------|---------------------------------------------------------------------------------------|
| 1 m                | 50-60%, BS allele-specific           | 33 y CC. asc., 47 y CC sigma, 47 y CC rectum                   | n.a.                                                                              | half-brother (mat. line) 51 gastric C                                                 |
| 2 f                | ~20%, BS                             | 58 y CC sigma, 59 y CC transversum + sigma MSS                 | n.a.                                                                              | son 34 y hyperplastic polyps                                                          |
| 3 m                | ~20%, BS                             | 41 y CC rectum                                                 | no: meth. erasure in three sons with different pat. alleles, brother n.i. unmeth. | mother 59 y CC, brother 44 y adenomas                                                 |
| 4 m                | 25% and <i>MLH1</i> duplication, BS  | 39 y CC transversum                                            | yes: CEM of 20% and duplication also in mother with 65 y CC and in sister         | mother 65 y CC, father adenomas                                                       |
| 5 f                | 50%, BS allele-specific              | 40 y CC rectum, 41 y CC sigma                                  | no: de novo set-up of CEM on mat. allele, brother inherited other mat. allele     | mother 33 y cervix C, 64 y CC (MSS) without CEM in blood                              |
| 6 m                | 50%, BS c.-269G meth                 | 40 y CC asc., 44 y CC rectum                                   | n.a., son inherited unmethylated allele                                           | father 50 y multiple adenomas                                                         |
| 7 m                | 50-60%, BS: allele-specific          | 33 y CC transversum                                            | n.a.                                                                              | no information                                                                        |
| 8 m                | 50%, BS                              | 35 y CC asc, 42 y + 48 y skin C, 49 y cystic sebaceous gland C | n.a.                                                                              | pat. uncle 72 y CC, mat. grandmother 84 y CC                                          |
| 9 f                | BS allele-specific but partial meth. | 37 y CC asc                                                    | no: de novo set-up of CEM on mat. allele                                          | father 41 y renal C, mother healthy unmeth.                                           |
| 10 f               | 50%, BS allele-specific              | 30 y CC left flexure                                           | n.a.                                                                              | no information                                                                        |
| 11 m               | 25-35%, BS                           | 46 y CC asc + CC transversum                                   | n.a., both sons unmeth., but n.i.                                                 |                                                                                       |
| 12 f               | 20-25%, BS                           | 35 CC asc                                                      | n.a.                                                                              |                                                                                       |
| 13 m               | 50%, BS allele-specific              | 38 y gastic C, 51 y CC rectum, adenomas                        | n.a., daughter inherited unmeth allele, sister n.i. unmeth.                       | grandmother CC                                                                        |
| 14 m               | 50-60%, BS allele-specific           | 53 y CC coecum                                                 | no: meth. erasure in both sons with paternal meth. allele                         | father 73 y bladder C, sister 44 y leukemia, son 22 y adenomas                        |
| 15 m               | 50%, BS c.-63_-58delins18 meth.      | 35 y CC                                                        | yes: sister also with 50% CEM and promoter variant c.-63_-58delins18 meth.        | mat. grandfather 64 y CC, mother 45 y BrC, mat. aunt 54 y BrC, father healthy unmeth. |
| 16 m               | 50%                                  | 30 y CC rectum, 41 y CC asc                                    |                                                                                   | no tumors reported                                                                    |

**Supplemental Table 1:** Details for the sixteen patients with a constitutional *MLH1* epimutation (CEM). The promoter methylation in blood is given in % if analysed by MS-MLPA, otherwise bisulphite sequencing (BS) was performed. The clinical data of the CEM carriers, transmission or segregation of CEM in family members, and family history of tumours are also listed. Diagnoses are given in years (y). Abbreviations: cancer (C), colon cancer (CC), ascendens (asc), breast cancer (BrC), maternal (mat.), methylated (meth.), paternal (pat.), not analysed (n.a.), not informative (n.i.).
